# Supplementary material
Source: PubMed Central journal article supplement (PMC4784026)
Supplement: AEM.03611-15_zam999116975so1.pdf [file AEM.03611-15_zam999116975so1.pdf]

## Supplementary Figure S1.

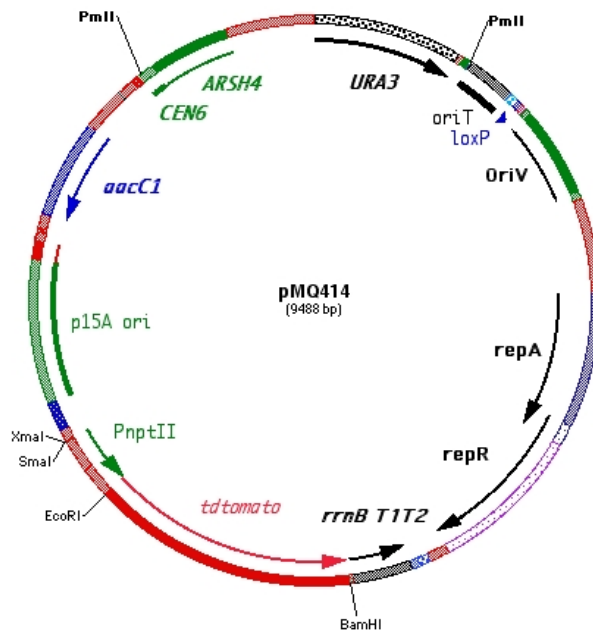

**Figure S1. Genetic map of pMQ414.** The p15a and IncQ bacterial replicons support maintenance of pMQ414 in a broad range of gram-negative bacterial genera. The key feature of this plasmid is the *tdtomato* gene under transcriptional control of the constitutive *nptII* promoter. The plasmid has the *aacC1* gentamicin resistance marker for selection and an RP4 *oriT* for conjugal transfer. The plasmid has replication machinery for *Saccharomyces cerevisiae* to facilitate recombination-based modifications. The *S. cerevisiae* machinery is flanked by PmlI restriction sites for optional removal of *CEN6*, *ARSH4*, and *URA3*. Restriction sites were also introduced flanking the *nptII* promoter and *tdtomato* gene to allow further modifications, such as exchange of *tdtomato* for *gfp*.
